# Supplementary material for: Population pharmacokinetics of intravenous Erwinia asparaginase in pediatric acute lymphoblastic leukemia patients
Source: PubMed Central journal article supplement — Haematologica. 2016 Nov 8;102(3):552–61. doi: 10.3324/haematol.2016.149195 (PMC5394946; doi:10.3324/haematol.2016.149195), 2017-03
Supplement: 2016.149195.SASSEN_SUPPL.pdf [file 2016.149195.SASSEN_SUPPL.pdf]

## Population pharmacokinetics of intravenous Erwinia asparaginase in pediatric acute lymphoblastic leukemia patients

Sebastiaan D.T. Sassen,<sup>1</sup> Ron A.A. Mathôt,<sup>2</sup> Rob Pieters,<sup>3</sup> Robin Q.H. Kloos,<sup>1</sup> Valérie de Haas,<sup>4</sup> Gertjan J.L. Kaspers,<sup>3,5</sup> Cor van den Bos,<sup>6</sup> Wim J.E. Tissing,<sup>7</sup> Maroeska te Loo,<sup>8</sup> Marc B. Bierings,<sup>9</sup> Wouter J.W. Kollen,<sup>10</sup> Christian M. Zwaan<sup>1</sup> and Inge M. van der Sluis<sup>1</sup>

CMZ and IMvdS contributed equally to this work.

<sup>1</sup>Department of Pediatric Oncology, Erasmus MC-Sophia Children's Hospital, Rotterdam; <sup>2</sup>Department of Hospital Pharmacy, Academic Medical Center, University of Amsterdam; <sup>3</sup>Princess Máxima Center for Pediatric Oncology, Utrecht; <sup>4</sup>Dutch Childhood Oncology Group, The Hague; <sup>5</sup>Department of Pediatric Oncology, VU University Medical Center, Amsterdam; <sup>6</sup>Department of Pediatric Oncology, Emma Children's Hospital, Academic Medical Center, Amsterdam; <sup>7</sup>Department of Pediatric Oncology, Beatrix Children's Hospital, University Medical Center, Groningen; <sup>8</sup>Department of Pediatric Hemato-Oncology, Radboud University Nijmegen Medical Center; <sup>9</sup>Pediatric Blood and Marrow Transplantation Program, University Medical Center Utrecht/Wilhelmina Children's Hospital and <sup>10</sup>Department of Pediatric Immunology, Hemato-Oncology and Stem Cell Transplantation, Leiden University Medical Center, the Netherlands

©2017 Ferrata Storti Foundation. This is an open-access paper. doi:10.3324/haematol.2016.149195

Received: May 17, 2016.

Accepted: October 27, 2016.

Pre-published: November 10, 2016.

Correspondence: i.vandersluis@erasmusmc.nl

---

## Supplement

### *Pharmacokinetic analysis*

Time profiles of *Erwinia* asparaginase concentrations were analyzed using the nonlinear mixed effects modeling approach implemented in NONMEM (version 7.2; Icon Development Solutions, Ellicott City, Maryland, USA). Additionally Pirana (version 2.7.1, for the model environment Pirana, Pirana Software & Consulting BV, The Netherlands)<sup>1</sup>, Xpose (version 4.4.1, Nicholas Jonsson and Mats Karlsson, Uppsala, Sweden)<sup>2</sup> and Perl speaks NONMEM (PsN) (version 4.2.0, Uppsala, Sweden)<sup>3</sup> were used.

All *Erwinia* asparaginase concentrations were log transformed prior to analysis. First order conditional estimates with interaction (FOCE+I) was used as method of analysis throughout the model building procedure. The data was initially fitted to a one-compartment linear model without an absorption compartment as the drug was administered intravenously. More complex models were evaluated; improvement of the fit of the model was evaluated by the precision of the estimated PK parameters, the change in the objective function values (OFV), goodness-of-fit plots (GOF) and visual predictive checks (VPC). A 3.84 point decrease in OFV for one degree of freedom was considered a significant improvement with a p-value of <0.05.

The data was obtained in a pediatric population, hence PK parameters were allometrically scaled to adequately describe the parameters across a wide range of body weights. For allometric scaling standard fixed exponent values of 0.75 for the flow dependent physiologic process parameters clearance (CL) and intercompartmental clearance (Q), and 1 for the volume related parameters apparent volume of distribution of the central compartment ( $V_c$ ) and peripheral compartment ( $V_p$ ) were used.<sup>4-6</sup>

Inter-patient and inter-occasion variability in clearances and volumes of distribution were characterized with exponential models. An occasion was defined as one month of treatment due to

the limited number of samples per occasion. For example, clearance in the  $i^{\text{th}}$  individual at the  $j^{\text{th}}$  occasion was estimated using equation 1:

$$\text{Eq.1} \quad CL_{i,j} = CL_{pop} * (WT/70)^{0.75} * \exp(\eta_i + \kappa_j)$$

Where  $CL_{pop}$  ( $= \Theta_{CL}$ ) is the typical population value for clearance in a patient with a standardized body weight of 70 kg and  $\eta_i$  and  $\kappa_j$  represents the random effect accounting for inter-individual deviation from the typical population value (IIV) and typical individual values (IOV) respectively.  $\eta_i$  and  $\kappa_j$  are assumed to be symmetrically distributed with a mean of 0 and estimated variance of  $\omega^2$  and  $\pi^2$ , respectively. An additive error model was used to describe the residual error in plasma concentrations.

After the finalization of the structural model, covariate models were built by a stepwise forward inclusion procedure. Continuous covariates were centered at the median and included in the model as described in equation 2. Categorical covariates were included in the model as described in equation 3:

$$\text{Eq.2} \quad CL_{i,j} = [CL_{pop} * (COV/median\ COV)^{\Theta_{cov}} * (WT/70)^{0.75}] * \exp(\eta_i + \kappa_j)$$

$$\text{Eq.3} \quad CL_{i,j} = [CL_{pop} * (\Theta_{cat})^{FLAG} * (WT/70)^{0.75}] * \exp(\eta_i + \kappa_j)$$

Where COV is the continuous covariate,  $\Theta_{cov}$  is the estimated exponent parameter of the continuous covariate.  $\Theta_{cat}$  is the estimated fraction parameter of the categorical covariate. FLAG is either 1 (covariate present) or 0 (not present). Other parameters are described in equation 1.

Covariates were included one at the time. The covariate with the greatest reduction in OFV was added to the base model. This was iterated over all the covariates until no statistically significant decrease in

OFV occurred. The available covariates were: weight, age, height, body surface area (BSA), sex, treatment protocol (ALL-10 and ALL-11) and treatment center. Dose interval was evaluated as covariate for patient on thrice weekly or every other day Erwinia asparaginase versus patients who switched to twice weekly Erwinia asparaginase.

For the internal validation of the model a non-parametric bootstrap procedures (n=1000) was performed and prediction corrected visual predictive checks (VPC) were obtained. The final model including covariates was used to perform Monte Carlo simulations (n=5000) for doses ranging from 100 to 2000 IU/kg (per 100 IU/kg steps) for patients weighing 10 to 100 kg (per 10 kg steps).

Conversion of IU/kg dose to IU/m<sup>2</sup>:

$$\text{Eq.4} \quad \text{Dose (IU/m}^2\text{)} = (\text{dose (IU/kg)} * \text{body weight (kg)}) / \text{BSA (m}^2\text{)}$$

BSA is the body surface area used in this formula is the BSA calculated from weight alone as described by Sharkey et al.<sup>7</sup>

#### *Dose interval correction*

Doses are adjusted according to asparaginase levels. Patients with high levels can switch to twice weekly administration. These patients have samples in the 84-118 hour timeframe. Figure 1 shows the pcVPC with the covariate interval (patients with twice weekly dosing versus thrice weekly). This improves the median predictions especially concerning the 84-118 hour timeframe. However variability is under predicted.

## References

1. Keizer RJ, van Benten M, Beijnen JH, Schellens JHM, Huitema ADR. Piraña and PCluster: a modeling environment and cluster infrastructure for NONMEM. *Comput Methods Programs Biomed.* 2011 Jan;101(1):72–9.
2. Jonsson EN, Karlsson MO. Xpose--an S-PLUS based population pharmacokinetic/pharmacodynamic model building aid for NONMEM. *Comput Methods Programs Biomed.* 1999 Jan;58(1):51–64.
3. Lindbom L, Pihlgren P, Jonsson EN, Jonsson N. PsN-Toolkit--a collection of computer intensive statistical methods for non-linear mixed effect modeling using NONMEM. *Comput Methods Programs Biomed.* 2005 Sep;79(3):241–57.
4. Anderson BJ, Holford NHG. Tips and traps analyzing pediatric PK data. *Paediatr Anaesth.* 2011 Mar;21(3):222–37.
5. Holford NH. A size standard for pharmacokinetics. *Clin Pharmacokinet.* 1996 May;30(5):329–32.
6. Wang C, Peeters MYM, Allegaert K, et al. A bodyweight-dependent allometric exponent for scaling clearance across the human life-span. *Pharm Res. Springer;* 2012 Jun 1;29(6):1570–81.
7. Sharkey I, Boddy A V, Wallace H, et al. Body surface area estimation in children using weight alone: application in paediatric oncology. *Br J Cancer. Nature Publishing Group;* 2001 Jul 6;85(1):23–8.

**Figure 1: Asparaginase concentration vs time after dose (interval adjustment)**

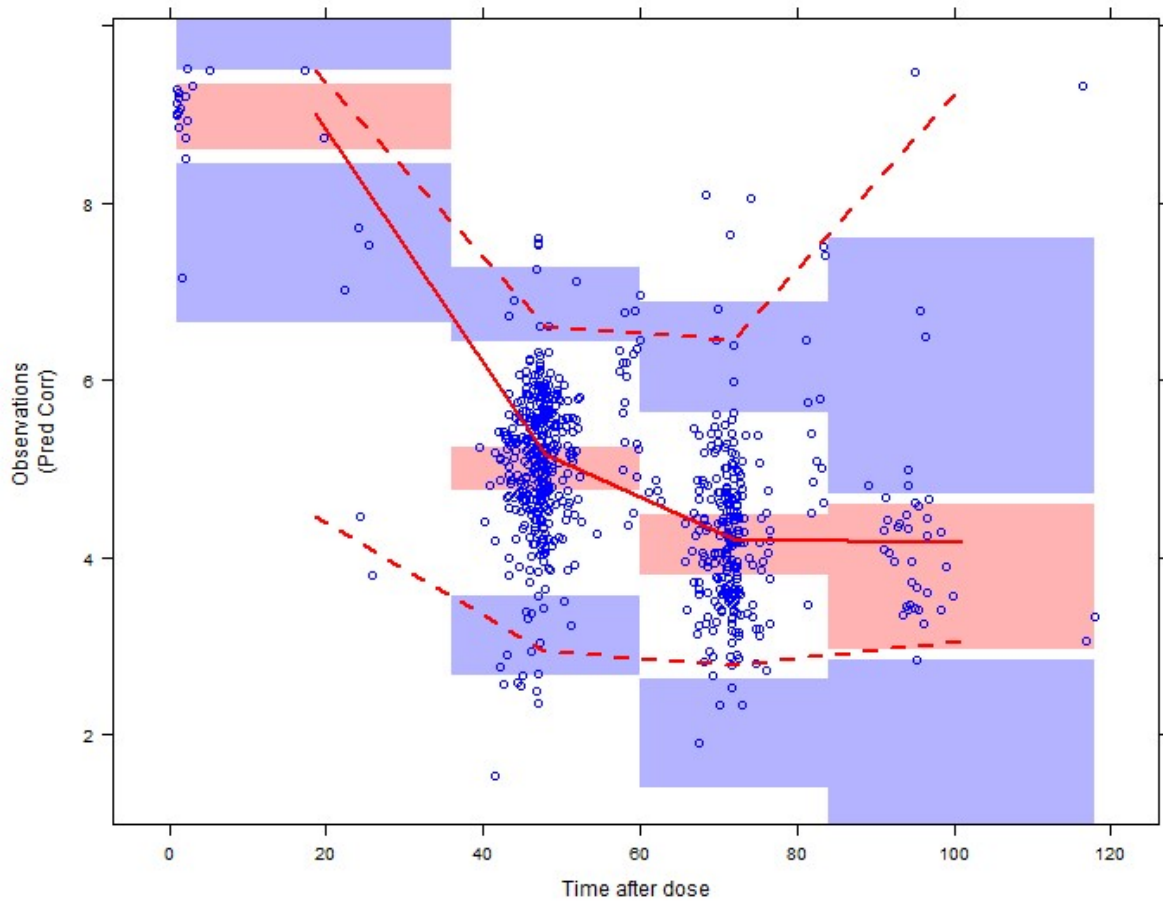

**Figure 1** Prediction corrected Visual prediction plot of observed log asparaginase levels versus time after dose (hours) of the final model with covariate dose interval. The red solid line indicates the median observed levels and the surrounding opaque red area the simulation based 95% interval for the median. The red dashed lines indicates the observed 5% and 95% percentiles and the surrounding opaque blue areas show the simulated 95% confidence intervals for the corresponding predicted percentiles.
