# Supplementary material for: Population pharmacokinetics of intravenous Erwinia asparaginase in pediatric acute lymphoblastic leukemia patients
Source: PubMed Central journal article supplement — Haematologica. 2016 Nov 8;102(3):552–61. doi: 10.3324/haematol.2016.149195 (PMC5394946; doi:10.3324/haematol.2016.149195), 2017-03
Supplement: 2016_149195-Disclosures_and_Contributions.pdf [file 2016_149195-Disclosures_and_Contributions.pdf]

Haematologica  
HAEMATOL/2016/149195  
Version 4

Population pharmacokinetics of intravenous Erwinia asparaginase in  
pediatric acute lymphoblastic leukemia patients

Sebastiaan D.T. Sassen, Ron A.A. Mathôt, Rob Pieters, Robin Q.H. Kloos, Valérie de Haas, Gertjan J.L. Kaspers, Cor van den Bos, Wim J.E. Tissing, Maroeska te Loo, Marc B. Bierings, Wouter J.W. Kollen, Christian M. Zwaan, and Inge M. van der Sluis

Disclosures: Authors R. Pieters and I.M. van der Sluis received research support and consultancy fees from Jazz/EUSA Pharmaceuticals and Medac.

Contributions: Acquisition of data: S.S., C.Z., I.S., R.P., R.K., G.K., C.B., W.T., M.L., M.B., W.K. Analysis and interpretation of data: S.S., R.M., C.Z., I.S. Author contributions: S.S., R.M., C.Z., I.S. Revised the manuscript critically: R.P., R.K., G.K., C.B., W.T., M.L., M.B., V.H., W.K.
